# Supplementary material for: Nanostructured ZnO as Multifunctional Carrier for a Green Antibacterial Drug Delivery System—A Feasibility Study
Source: PubMed Central journal article supplement (PMC6473990; doi:10.3390/nano9030407), 2019-03-11
Supplement: nanomaterials-09-00407-s001.pdf [file nanomaterials-09-00407-s001.pdf]

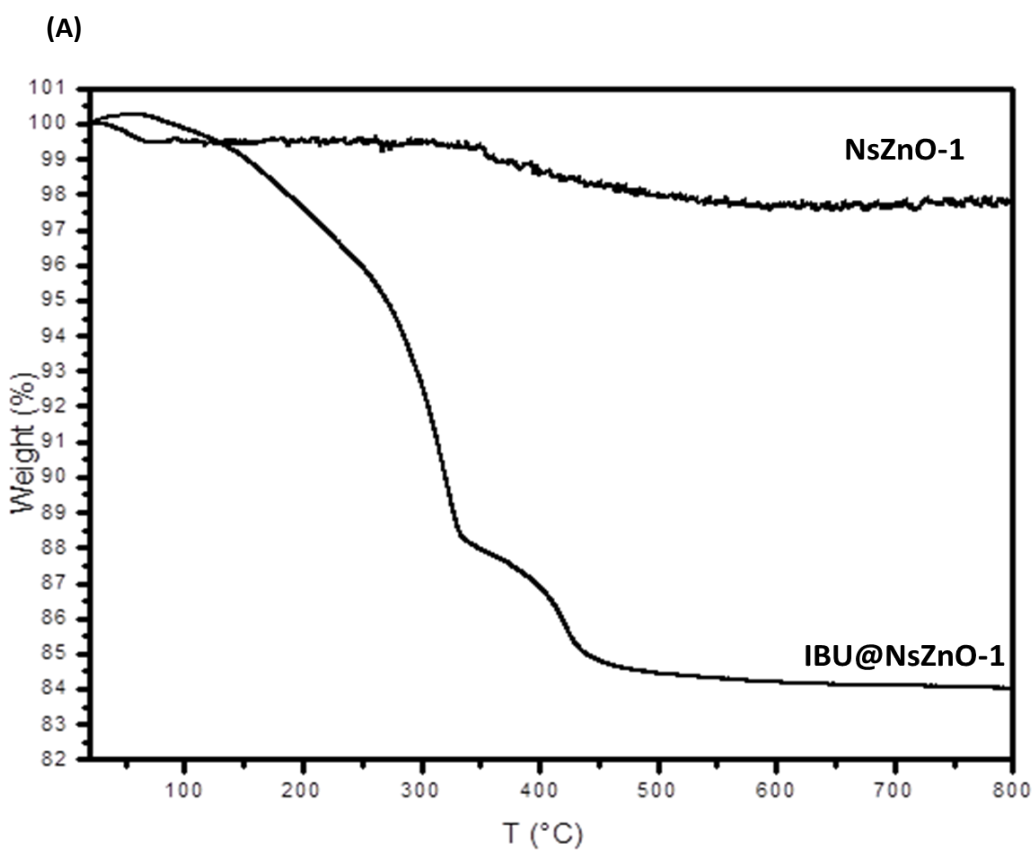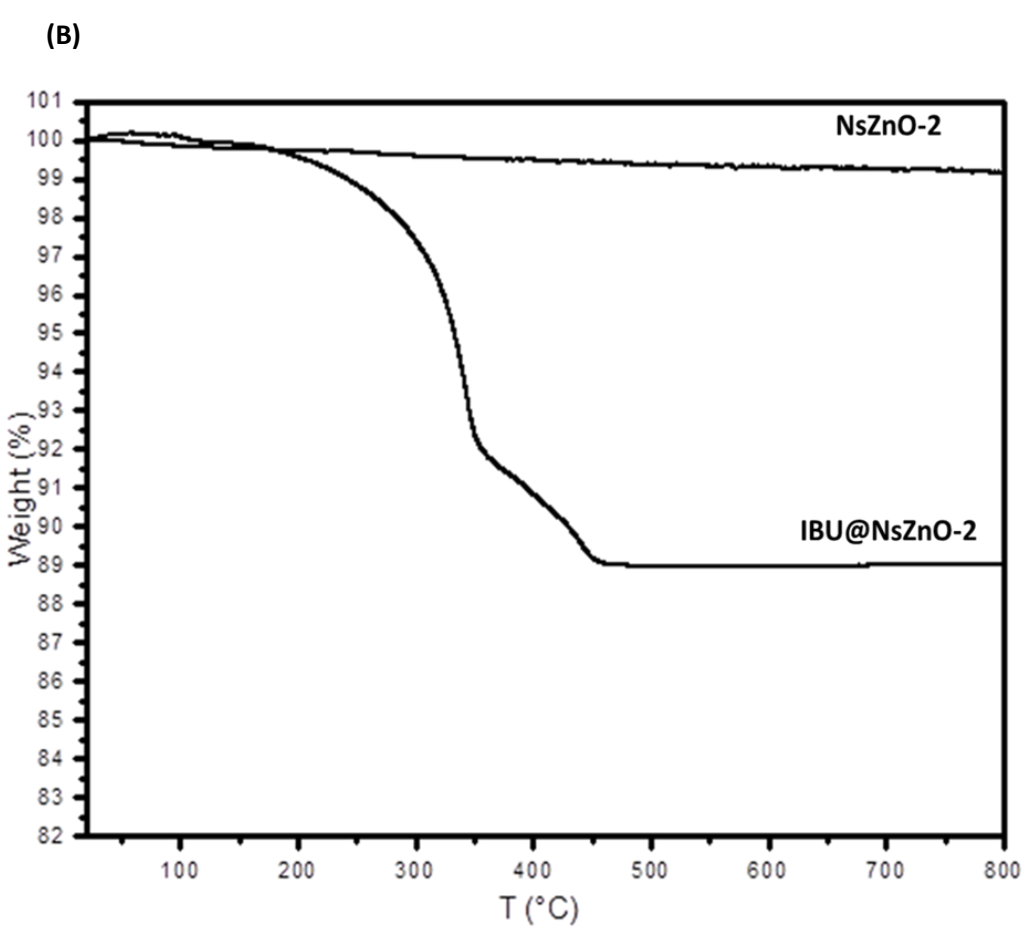

Figure S1 Section A: TG curves of NsZnO-1 and IBU@NsZnO-1; Section B: TG curves of NsZnO-2 and IBU@NsZnO-2.
